# Supplementary material
Source: PubMed Central journal article supplement (PMC3660499)
Supplement: NIHMS453170-supplement-1.pdf [file NIHMS453170-supplement-1.pdf]

## Supplementary Information

### **IL-17-committed V $\gamma$ 4<sup>+</sup> $\gamma\delta$ T cell deficiency in a spontaneous Sox13 mutant CD45.1 congenic mouse substrain protects from dermatitis**

Elizabeth E. Gray<sup>1,2,3</sup>, Francisco Ramírez-Valle<sup>1,2,4</sup>, Ying Xu<sup>1,2</sup>, Shuang Wu<sup>1,2</sup>, Zhihao Wu<sup>5</sup>,  
Klaus E. Karjalainen<sup>5</sup>, and Jason G. Cyster<sup>1,2\*</sup>

<sup>1</sup>Howard Hughes Medical Institute, <sup>2</sup>Department of Microbiology and Immunology, <sup>3</sup>Biomedical Sciences Graduate Program, and <sup>4</sup>Department of Dermatology, University of California San Francisco (UCSF), California, USA. <sup>5</sup>School of Biological Sciences, Nanyang Technological University, Singapore.

\*Correspondence should be addressed to J.G.C. ([jason.cyster@ucsf.edu](mailto:jason.cyster@ucsf.edu)); Phone 415 502-6427; Fax 415 502-8424.

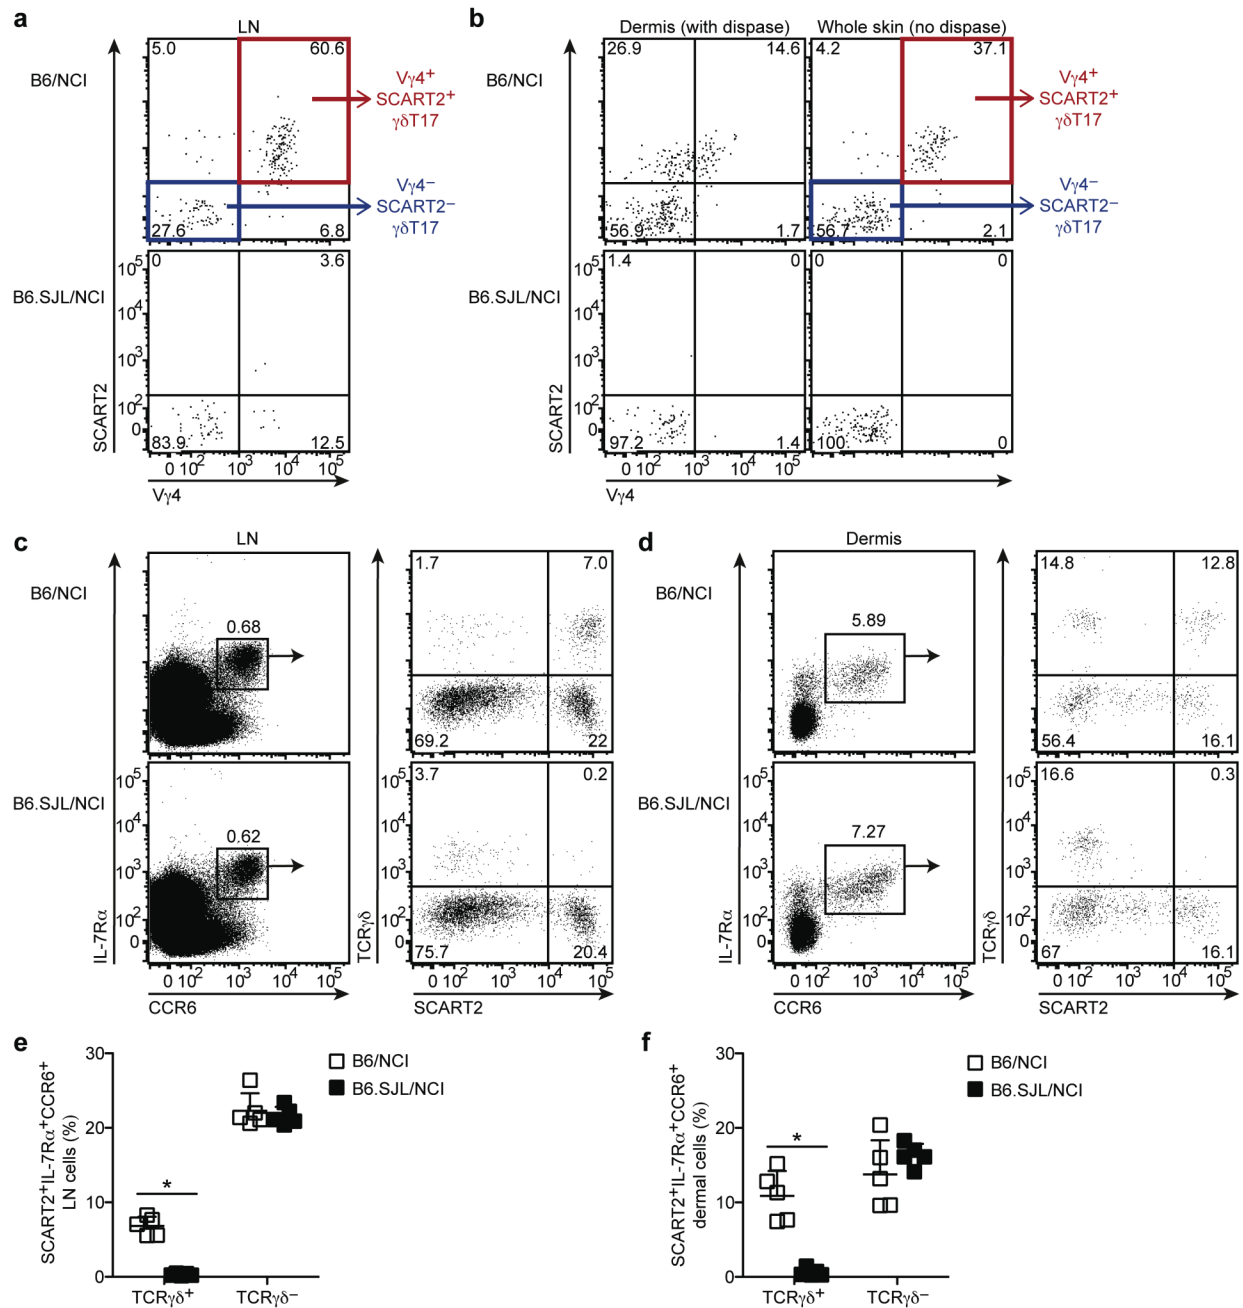

**Supplementary Fig. 1** SCART2 and CCR6 expression by  $\gamma\delta$  T and non- $\gamma\delta$  T cells in B6/NCI and B6.SJL/NCI mice. **(a,b)** Flow cytometric detection of V $\gamma$ 4 and SCART2 on CCR6<sup>+</sup>  $\gamma\delta$  T cells in lymph node **(a)**, dermal, and whole ear skin **(b)** cell suspensions from B6/NCI (top panels) and B6.SJL/NCI (bottom panels) mice. Note that V $\gamma$ 4 staining is sensitive to digestion with dispase (used to separate the dermal and epidermal layers of the ear skin). The two subsets of CCR6<sup>+</sup>  $\gamma\delta$ T17 cells are indicated in red (V $\gamma$ 4<sup>+</sup>SCART2<sup>+</sup>) and blue (V $\gamma$ 4<sup>-</sup>SCART2<sup>-</sup>). **(c,d)**

Flow cytometric detection of SCART2<sup>+</sup>IL-7R $\alpha$ <sup>+</sup>CCR6<sup>+</sup> IL-17-committed TCR $\gamma$  $\delta$ <sup>+</sup> and TCR $\gamma$  $\delta$ <sup>-</sup> cells in digested lymph node (**c**) and dermal (**d**) cell suspensions. (**e,f**) Quantification of SCART2<sup>+</sup>IL-7R $\alpha$ <sup>+</sup>CCR6<sup>+</sup> IL-17-committed TCR $\gamma$  $\delta$ <sup>+</sup> and TCR $\gamma$  $\delta$ <sup>-</sup> cell frequency in digested lymph node (**e**) and dermal (**f**) cell suspensions, plotted as percent of IL-7R $\alpha$ <sup>+</sup>CCR6<sup>+</sup> cells. Each symbol represents an individual mouse; horizontal and vertical bars represent the mean ( $\pm$  s.d.). \* $P \leq 0.01$ . Data are representative of at least two experiments with at least two mice.

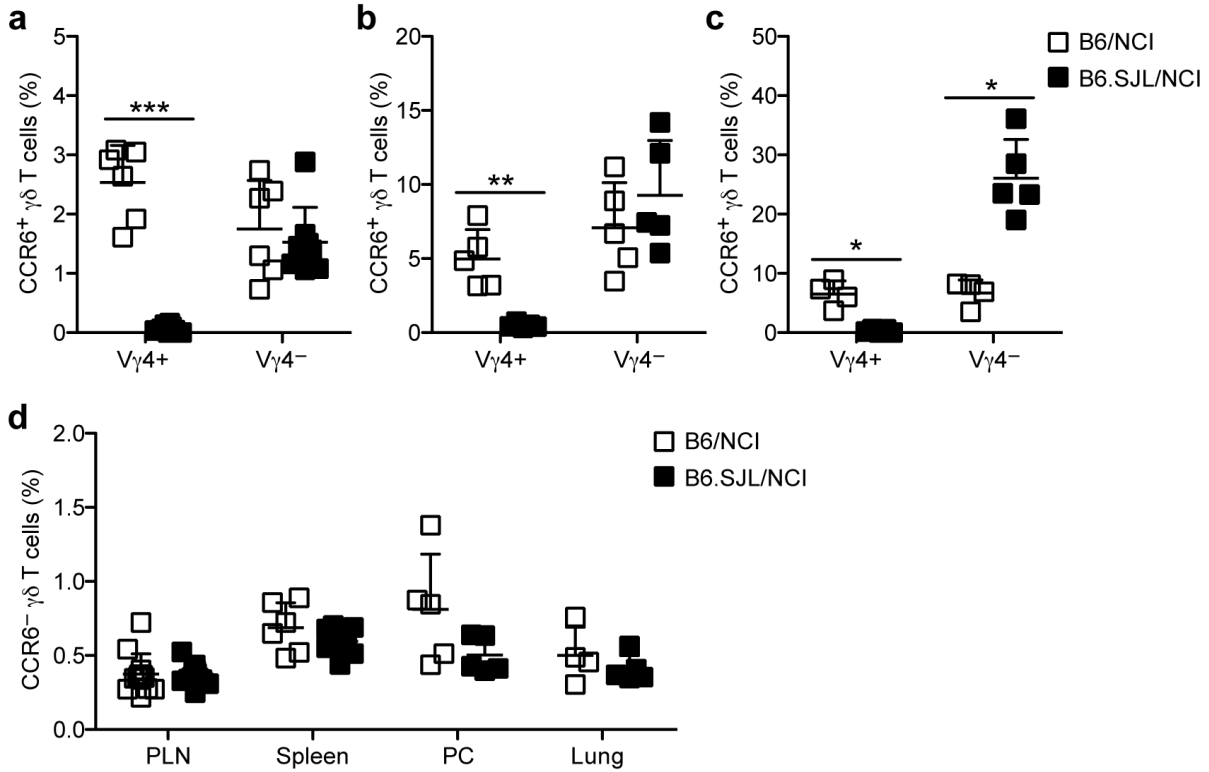

**Supplementary Fig. 2** B6.SJL/NCI mice lack V $\gamma$ 4<sup>+</sup>  $\gamma$  $\delta$ T17 cells in multiple tissues. (**a-c**) Quantification of V $\gamma$ 4<sup>+</sup>CCR6<sup>+</sup> and V $\gamma$ 4<sup>-</sup>CCR6<sup>+</sup>  $\gamma$  $\delta$ T17 cell frequency in spleen (**a**), peritoneal lavage (**b**), and digested lung (**c**) cell suspensions in B6/NCI and B6.SJL/NCI mice gated as in **Fig. 1a**, plotted as % of total  $\gamma$  $\delta$  T cells. (**d**) Quantification of CCR6<sup>-</sup> (non-IL-17-committed)  $\gamma$  $\delta$  T cell frequency in peripheral lymph node (PLN), spleen, peritoneal lavage, and digested lung cell suspensions in B6/NCI and B6.SJL/NCI mice, plotted as % of total live cells. Data are representative of at least two experiments. Each symbol represents an individual mouse; horizontal and vertical bars represent the mean ( $\pm$  s.d.). \* $P \leq 0.05$ , \*\* $P \leq 0.01$ , \*\*\* $P \leq 0.001$ . Data are representative of at least two experiments with at least four mice.

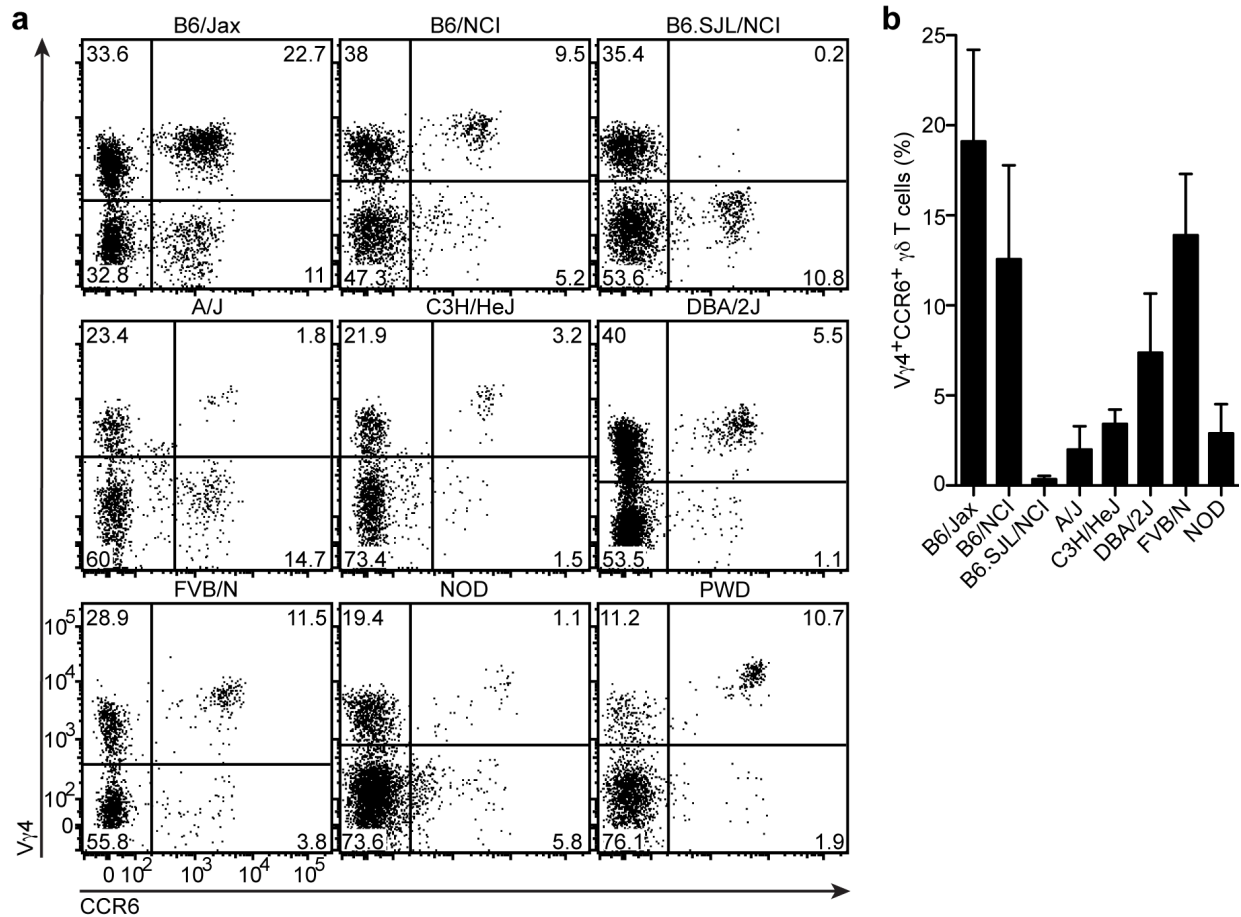

**Supplementary Fig. 3**  $V\gamma 4^+CCR6^+$   $\gamma\delta T17$  cell frequency in various inbred mouse strains. **(a)** Flow cytometric detection of  $V\gamma 4^+CCR6^+$   $\gamma\delta T17$  cells in digested LN cell suspensions from mice of the indicated strain, gated on total  $\gamma\delta$  T cells. Numbers indicate frequency of total  $\gamma\delta$  T cells. **(b)** Frequency of  $V\gamma 4^+CCR6^+$   $\gamma\delta T17$  cells (plotted as % of total  $\gamma\delta$  T cells) in digested lymph node cell suspensions from mice of the indicated strain. Bars show mean ( $\pm$  s.d.). Data are representative of at least two mice of each strain, except the PWD strain in which only 1 mouse was analyzed.  $V\gamma 4^+CCR6^+$   $\gamma\delta T17$  cells are present in all strains analyzed at frequencies significantly greater than B6.SJL/NCI mice (two-tailed, unpaired t-test). The frequency of  $V\gamma 4^+CCR6^+$   $\gamma\delta$  T cells varied from 5% to more than 20% of total  $\gamma\delta$  T cells both in wild-type mice raised in our colony as well as B6/NCI mice from NCI and B6/Jax mice from Jax. The frequency of  $V\gamma 4^+CCR6^+$   $\gamma\delta T17$  cells is  $\sim$ 2-6-fold lower in A/J, C3H/HeJ, DBA/2J and NOD mice compared to B6/NCI mice. The basis for the intermediate frequency of cells in these strains is unknown, but is likely due to polymorphisms at multiple loci.

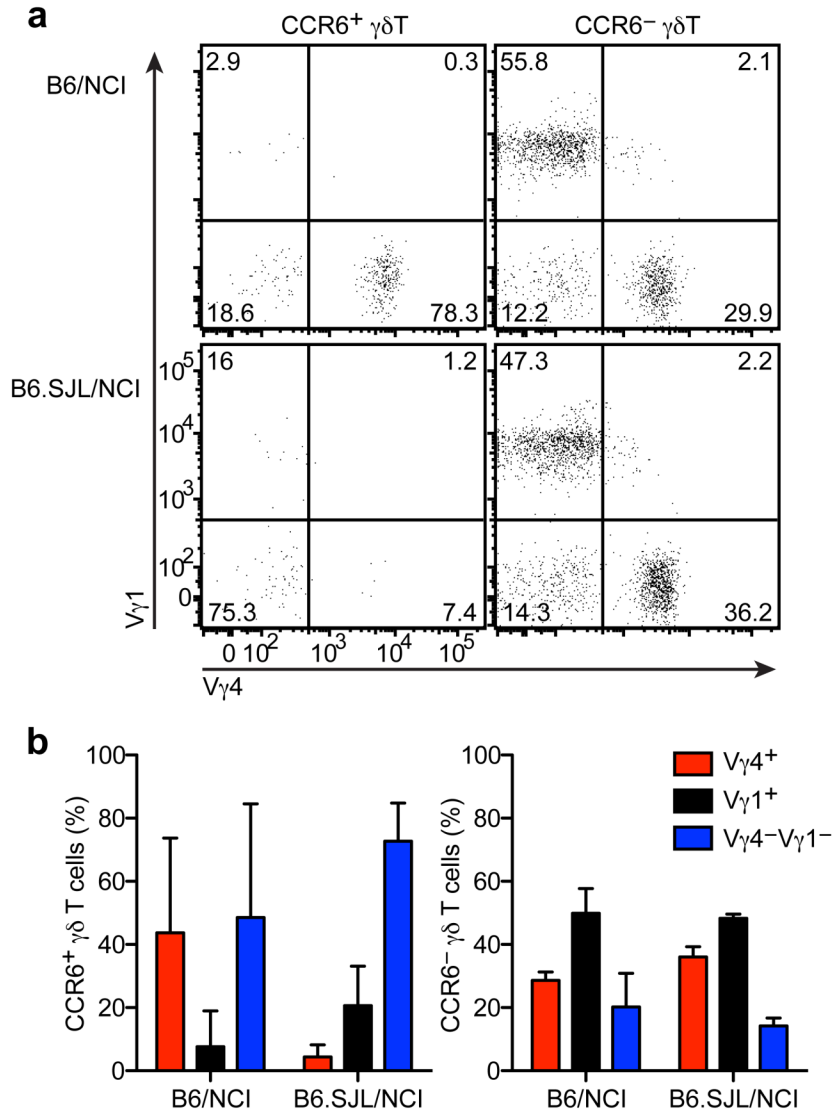

**Supplementary Fig. 4** V $\gamma$ 4 and V $\gamma$ 1 expression by CCR6<sup>+</sup>  $\gamma$  $\delta$ T17 and CCR6<sup>-</sup>  $\gamma$  $\delta$  T cells. **(a)** Flow cytometric detection of V $\gamma$ 4 and V $\gamma$ 1 by CCR6<sup>+</sup> (left panels) and CCR6<sup>-</sup> (right panels)  $\gamma$  $\delta$  T cells in lymph node cell suspensions from B6/NCI (top panels) and B6.SJL/NCI (bottom panels) mice. Note that lymph nodes were not enzyme digested as V $\gamma$ 1 staining was found to be sensitive to Liberase™. **(b)** Quantification of V $\gamma$ 4<sup>+</sup>, V $\gamma$ 1<sup>+</sup>, and V $\gamma$ 1<sup>-</sup>V $\gamma$ 4<sup>-</sup>  $\gamma$  $\delta$  T cell frequency among CCR6<sup>+</sup> (left panel) and CCR6<sup>-</sup> (right panel)  $\gamma$  $\delta$  T cells in B6/NCI and B6.SJL/NCI mice. Bars show mean ( $\pm$  s.d.). Data are representative of four B6/NCI mice and three B6.SJL/NCI mice.

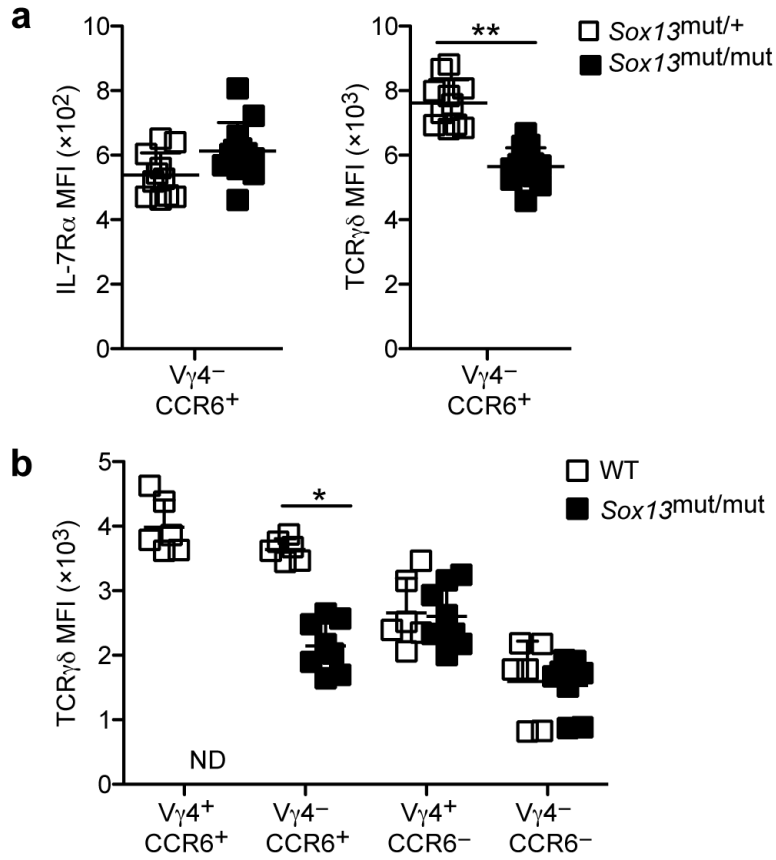

**Supplementary Fig. 5** Expression of IL-7R $\alpha$  and TCR $\gamma\delta$  on V $\gamma 4^-$   $\gamma\delta$ T17 cells. **(a)** F<sub>1</sub> mice were backcrossed to *Sox13*<sup>mut/mut</sup> (B6.SJL/NCI) mice to generate *Sox13*<sup>mut/+</sup> or *Sox13*<sup>mut/mut</sup> mice. IL-7R $\alpha$  (left panel) and TCR $\gamma\delta$  (right panel) mean fluorescence intensity on V $\gamma 4^-$  CCR6 $^+$   $\gamma\delta$ T17 cells from neonatal thymi harvested 0 or 5 days after birth. **(b)** TCR $\gamma\delta$  mean fluorescence intensity on indicated subsets of LN  $\gamma\delta$  T cells from wild-type (B6/NCI) and *Sox13*<sup>mut/mut</sup> (B6.SJL/NCI) mice. Each symbol represents an individual mouse; horizontal and vertical bars represent the mean ( $\pm$  s.d.). \* $P \leq 0.001$ , \*\* $P \leq 0.0001$ . Data are representative of at least two experiments with at least six mice.

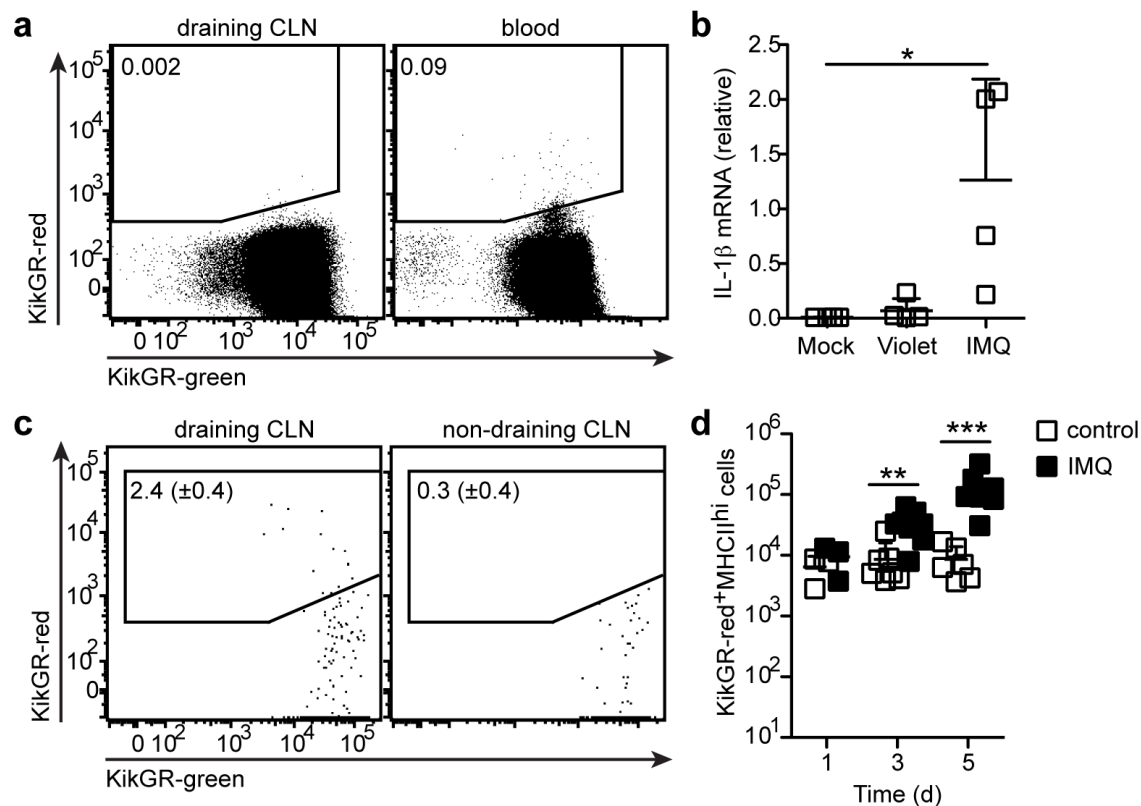

**Supplementary Fig. 6** Detection of KikGR-red<sup>+</sup> cells. **(a)** Flow cytometric detection of total KikGR-red<sup>+</sup> and KikGR-green<sup>+</sup> cells in draining cervical lymph node (CLN) and blood cell suspensions harvested immediately after ear skin exposure to violet light, gated on total live cells. **(b)** Quantitative RT-PCR analysis of IL-1β mRNA abundance relative to HPRT. Each point represents data for an individual mouse ear. **(c)** Flow cytometric detection of KikGR-red<sup>+</sup> MHCII<sup>hi</sup>CD11c<sup>+</sup> dendritic cells in draining (left) and non-draining (right) CLNs harvested 24 hours after ear skin photoconversion, gated on total MHCII<sup>hi</sup>CD11c<sup>+</sup> dendritic cells. The mean (± s.d.) %KikGR-red<sup>+</sup> cells from four independent experiments are indicated. **(d)** Number of KikGR-red<sup>+</sup> MHCII<sup>hi</sup>CD11c<sup>+</sup> dendritic cells in control or imiquimod-treated draining lymph nodes harvested at the indicated day of imiquimod treatment and one day after photoconversion. Each symbol represents data for an individual CLN. Horizontal and vertical bars represent the mean (± s.d.) **(b,d)**. \* $P \leq 0.05$ , \*\* $P \leq 0.01$ , \*\*\* $P \leq 0.001$ . Data are representative of at least two experiments with at least two mice.



**Supplementary Table 1**

| Variation Location Left (bp) | Variation Location Right (bp) | C57BL/6 reference nucleotide sequence | B6.SJL/NCI nucleotide sequence | Gene           | Change Type    | C57BL/6 reference amino acid sequence | B6.SJL/NCI amino acid sequence | dbsnp      | dbSNP in A/J, DBA2, FVB.N, NOD, or PWD |
|------------------------------|-------------------------------|---------------------------------------|--------------------------------|----------------|----------------|---------------------------------------|--------------------------------|------------|----------------------------------------|
| 134963204                    | 134963205                     | c                                     | t                              | <i>Pik3c2b</i> | Non-Synonymous | P                                     | S                              | rs32284602 | DBA2                                   |
| 135184423                    | 135184424                     | c                                     | g                              | <i>Plekha6</i> | Non-Synonymous | T                                     | S                              | rs3164254  | A/J                                    |
| 135255656                    | 135255657                     | a                                     | t                              | <i>Ren1</i>    | Non-Synonymous | E                                     | D                              | rs3166350  | DBA/2J                                 |
| 135260500                    | 135260501                     | a                                     | g                              | <i>Etnk2</i>   | Non-Synonymous | S                                     | G                              | rs33551174 | DBA2                                   |
| 135273492                    | 135273493                     | t                                     | a                              | <i>Etnk2</i>   | Non-Synonymous | V                                     | E                              | rs33549639 | DBA2, FVB.N                            |
| 135273623                    | 135273624                     | g                                     | t                              | <i>Etnk2</i>   | Non-Synonymous | A                                     | S                              | rs33557119 | DBA2, FVB.N                            |
| 135518731                    | 135518732                     | g                                     | a                              | <i>Zc3h11a</i> | Non-Synonymous | P                                     | S                              | rs31371115 | DBA2, FVB.N                            |
| 135521198                    | 135521199                     | c                                     | t                              | <i>Zc3h11a</i> | Non-Synonymous | V                                     | I                              | rs32342388 | DBA2, FVB.N                            |
| 135576555                    | 135576556                     | t                                     | c                              | <i>Lax1</i>    | Non-Synonymous | R                                     | G                              | rs13472481 | DBA2, FVB.N                            |
| 135577146                    | 135577147                     | t                                     | c                              | <i>Lax1</i>    | Non-Synonymous | N                                     | D                              | rs32239291 | DBA2, FVB.N                            |
| 135580211                    | 135580212                     | g                                     | a                              | <i>Lax1</i>    | Non-Synonymous | P                                     | S                              | rs32582773 | DBA2, FVB.N                            |
| 135801747                    | 135801748                     | c                                     | g                              | <i>Optc</i>    | Non-Synonymous | S                                     | T                              | rs37647909 | PWD                                    |
| 136085106                    | 136085107                     | c                                     | t                              | <i>Chi3l1</i>  | Non-Synonymous | A                                     | V                              | rs30876553 | NOD                                    |
| 136195898                    | 136195899                     | g                                     | a                              | <i>Ppfia4</i>  | Non-Synonymous | P                                     | S                              | rs30872293 | A/J                                    |
| 136304244                    | 136304245                     | c                                     | t                              | <i>Cyb5r1</i>  | Non-Synonymous | R                                     | W                              | rs30875255 | A/J                                    |
| 136868744                    | 136868745                     | c                                     | t                              | <i>Ube2t</i>   | Non-Synonymous | A                                     | V                              | rs46095918 | DBA2                                   |
| 136883665                    | 136883666                     | c                                     | t                              | <i>Lgr6</i>    | Non-Synonymous | V                                     | I                              | rs3661512  | A/J                                    |
| 136884586                    | 136884587                     | a                                     | t                              | <i>Lgr6</i>    | Non-Synonymous | S                                     | T                              | rs30920584 | DBA2, A/J                              |
| 136887212                    | 136887213                     | g                                     | t                              | <i>Lgr6</i>    | Non-Synonymous | H                                     | N                              | rs50910866 | DBA2                                   |
| 136900053                    | 136900054                     | c                                     | t                              | <i>Lgr6</i>    | Non-Synonymous | S                                     | N                              | rs30840049 | DBA2, FVB.N, A/J                       |
| 137001653                    | 137001654                     | g                                     | c                              | <i>Lgr6</i>    | Non-Synonymous | A                                     | G                              | rs50577640 | DBA2, A/J                              |
| 137005612                    | 137005613                     | c                                     | t                              | <i>Ptprv</i>   | Non-Synonymous | G                                     | S                              | rs51027693 | DBA2, A/J                              |
| 137005621                    | 137005622                     | a                                     | t                              | <i>Ptprv</i>   | Non-Synonymous | Y                                     | N                              | rs49112393 | DBA2, A/J                              |
| 137005975                    | 137005976                     | g                                     | c                              | <i>Ptprv</i>   | Non-Synonymous | Q                                     | E                              | rs45683311 | A/J                                    |
| 137008017                    | 137008018                     | t                                     | c                              | <i>Ptprv</i>   | Non-Synonymous | H                                     | R                              |            | A/J, DBA/2J, NOD                       |
| 137011210                    | 137011211                     | g                                     | c                              | <i>Ptprv</i>   | Non-Synonymous | P                                     | R                              | rs47516732 | DBA2, A/J                              |
| 137015837                    | 137015838                     | t                                     | c                              | <i>Ptprv</i>   | Stop           | *                                     |                                | rs30834255 | DBA2, A/J                              |
| 137016275                    | 137016276                     | a                                     | g                              | <i>Ptprv</i>   | Non-Synonymous | V                                     | A                              | rs30834254 | DBA2, FVB.N, A/J                       |

|           |           |    |    |                |                |   |   |             |                     |
|-----------|-----------|----|----|----------------|----------------|---|---|-------------|---------------------|
| 137016849 | 137016850 | c  | g  | <i>Ptprv</i>   | Non-Synonymous | V | L | rs47752571  | DBA2                |
| 137016917 | 137016918 | g  | a  | <i>Ptprv</i>   | Non-Synonymous | T | I | rs32163068  | DBA2, A/J           |
| 137020322 | 137020323 | a  | g  | <i>Ptprv</i>   | Non-Synonymous | V | A | rs30833331  | A/J                 |
| 137020329 | 137020330 | t  | c  | <i>Ptprv</i>   | Non-Synonymous | S | G | rs31336463  | A/J                 |
| 137020670 | 137020672 | cg | aa | <i>Ptprv</i>   | Non-Synonymous | A | V |             | A/J, DBA/2J,<br>NOD |
| 137021034 | 137021035 | t  | c  | <i>Ptprv</i>   | Non-Synonymous | I | V | rs32050402  | DBA2, A/J           |
| 137021922 | 137021923 | a  | g  | <i>Ptprv</i>   | Non-Synonymous | Y | H | rs31629804  | DBA2, A/J           |
| 137021931 | 137021932 | c  | t  | <i>Ptprv</i>   | Non-Synonymous | V | I | rs47978058  | DBA2, A/J           |
| 137022875 | 137022876 | c  | t  | <i>Ptprv</i>   | Non-Synonymous | V | M | rs30791899  | DBA2, A/J           |
| 137022894 | 137022895 | t  | a  | <i>Ptprv</i>   | Stop           |   |   | rs32267008  | DBA2, A/J           |
| 137023156 | 137023157 | t  | c  | <i>Ptprv</i>   | Non-Synonymous | E | G | rs33860307  | DBA2, A/J           |
| 137031052 | 137031053 | a  | g  | <i>Ptpn7</i>   | Non-Synonymous | Q | R | rs107631253 | A/J, DBA2, NOD      |
| 137039819 | 137039820 | g  | t  | <i>Ptpn7</i>   | Non-Synonymous | E | D | rs48605910  | DBA2, A/J           |
| 137159673 | 137159674 | c  | t  | <i>Rnpep</i>   | Non-Synonymous | A | T | rs108794650 | DBA2                |
| 137180206 | 137180207 | c  | g  | <i>Rnpep</i>   | Non-Synonymous | R | P | rs32740521  | DBA2, A/J           |
| 137180554 | 137180555 | g  | c  | <i>Rnpep</i>   | Non-Synonymous | A | G | rs37563888  | DBA2, A/J           |
| 137260650 | 137260651 | c  | t  | <i>Lmod1</i>   | Non-Synonymous | T | I | rs50126852  | DBA2, A/J           |
| 137298827 | 137298828 | a  | g  | <i>Ipo9</i>    | Non-Synonymous | V | A | rs32645804  | DBA2, FVB.N,<br>A/J |
| 137481304 | 137481305 | a  | t  | <i>Nav1</i>    | Non-Synonymous | D | E | rs13476124  | DBA2                |
| 137723958 | 137723959 | c  | t  | <i>Lad1</i>    | Non-Synonymous | P | S | rs32494953  | DBA2                |
| 137724600 | 137724601 | c  | t  | <i>Lad1</i>    | Non-Synonymous | R | C | rs31421022  | DBA2                |
| 138015293 | 138015294 | t  | c  | <i>Cacna1s</i> | Non-Synonymous | F | S | rs30889688  | DBA2                |
| 138157287 | 138157288 | g  | a  | <i>Gpr25</i>   | Non-Synonymous | P | L |             | DBA2                |
| 138177892 | 138177893 | c  | t  | <i>Camsap2</i> | Non-Synonymous | R | Q | rs30887353  | DBA2                |
| 138313630 | 138313631 | t  | c  | <i>Ddx59</i>   | Non-Synonymous | V | A | rs31374585  | DBA2                |
| 138364856 | 138364857 | a  | g  | <i>Kif14</i>   | Non-Synonymous | N | D | rs31343464  | DBA2                |
| 138365552 | 138365553 | a  | g  | <i>Kif14</i>   | Non-Synonymous | K | E | rs31149596  | DBA2                |
| 138374942 | 138374943 | g  | a  | <i>Kif14</i>   | Non-Synonymous | A | T | rs32330511  | DBA2                |
| 138386909 | 138386910 | a  | g  | <i>Kif14</i>   | Non-Synonymous | S | G | rs33596371  | DBA2                |
| 138400008 | 138400009 | c  | t  | <i>Kif14</i>   | Non-Synonymous | L | F | rs33591711  | DBA2                |
| 138412538 | 138412539 | t  | c  | <i>Kif14</i>   | Non-Synonymous | F | L | rs32540095  | DBA2                |
| 138422360 | 138422361 | t  | c  | <i>Kif14</i>   | Non-Synonymous | V | A | rs31477062  | DBA2                |
| 138848702 | 138848703 | c  | a  | <i>Nr5a2</i>   | Non-Synonymous | R | L | rs31516099  | DBA2                |

|                  |                  |           |           |                     |                       |           |           |            |                     |
|------------------|------------------|-----------|-----------|---------------------|-----------------------|-----------|-----------|------------|---------------------|
| 139996253        | 139996254        | t         | g         | <i>Ptprc</i>        | Non-Synonymous        | N         | T         | rs33599178 | FVB.N, NOD          |
| <b>140004400</b> | <b>140004402</b> | <b>ac</b> | <b>ga</b> | <b><i>Ptprc</i></b> | <b>Non-Synonymous</b> | <b>ES</b> | <b>DP</b> |            |                     |
| 140004414        | 140004415        | a         | g         | <i>Ptprc</i>        | Non-Synonymous        | V         | A         | rs33604282 | FVB.N, NOD          |
| 140008831        | 140008832        | t         | c         | <i>Ptprc</i>        | Non-Synonymous        | K         | E         |            | NOD                 |
| 141131356        | 141131357        | t         | c         | <i>Crb1</i>         | Non-Synonymous        | M         | V         | rs30926079 | DBA2, FVB.N,<br>A/J |
| 141134199        | 141134200        | a         | t         | <i>Crb1</i>         | Non-Synonymous        | H         | Q         | rs30925219 | DBA2, FVB.N,<br>A/J |
| 141137715        | 141137716        | g         | a         | <i>Crb1</i>         | Non-Synonymous        | P         | S         | rs30932205 | A/J, FVB.N          |
| 141139572        | 141139573        | c         | t         | <i>Crb1</i>         | Non-Synonymous        | G         | R         | rs30930641 | A/J, FVB.N          |
| 141139994        | 141139995        | c         | t         | <i>Crb1</i>         | Non-Synonymous        | R         | H         | rs30930638 | A/J, FVB.N          |
| 141370151        | 141370152        | a         | g         | <i>Aspm</i>         | Non-Synonymous        | I         | V         | rs47988436 | DBA2, FVB.N,<br>A/J |
| 141670651        | 141670652        | g         | c         | <i>Gm4788</i>       | Non-Synonymous        | Q         | E         | rs50727546 | DBA2, A/J           |
| 141710019        | 141710020        | a         | g         | <i>Cfhr2</i>        | Non-Synonymous        | M         | T         | rs6233562  | DBA2, FVB.N,<br>A/J |
| 141710036        | 141710037        | a         | c         | <i>Cfhr2</i>        | Non-Synonymous        | N         | K         | rs6233591  | DBA2, A/J           |
| 141727751        | 141727752        | t         | c         | <i>Cfhr2</i>        | Non-Synonymous        | K         | R         | rs47778423 | DBA2                |
| 142251124        | 142251125        | g         | a         | <i>Kcnt2</i>        | Non-Synonymous        | S         | N         | rs32647250 | A/J, FVB.N          |
| 145607144        | 145607145        | c         | t         | <i>Trove2</i>       | Non-Synonymous        | V         | I         | rs30973564 | A/J, FVB.N          |
| 145607164        | 145607165        | t         | c         | <i>Trove2</i>       | Non-Synonymous        | D         | G         | rs30972582 | PWD                 |

**Supplementary Table 1** List of coding variants identified by whole exome sequencing of B6.SJL/NCI mouse gDNA located within 3cM of *Ptprc*. 77 coding variants were either reported in the NIH dbSNP database (<http://www.ncbi.nlm.nih.gov/snp>) or Sanger mouse genomes project (<http://www.sanger.ac.uk/cgi-bin/modelorgs/mousegenomes/snps.pl>) in A/J, DBA2, C3H/HeJ, FVB.N, NOD and/or PWD strains (at least one strain in which the coding variant has been reported is listed). 1 coding variant is known to be present in *Ptprc<sup>a</sup>* (CD45.2) alleles<sup>1</sup> (in bold).

**Supplementary Table 2**

| Variation Location Right (bp) | C57BL/6 reference nucleotide sequence | B6.SJL/NCI nucleotide sequence | Gene                 | Change Type    | C57BL/6 reference amino acid sequence | B6.SJL/NCI amino acid sequence | dbSNP in B6.SJL/Jax? |
|-------------------------------|---------------------------------------|--------------------------------|----------------------|----------------|---------------------------------------|--------------------------------|----------------------|
| 135283363                     |                                       | g                              | <i>Sox13</i>         | Frameshift     |                                       |                                | Only B6.SJL/NCI      |
| 135811709                     | c                                     | t                              | <i>Prelp</i>         | Non-Synonymous | R                                     | K                              | B6.SJL/Jax           |
| 136045973                     | aag                                   | ggt                            | <i>Chit1</i>         | Non-Synonymous | ER                                    | EV                             | B6.SJL/Jax           |
| 136094058                     | c                                     | t                              | <i>Mybph</i>         | Non-Synonymous | R                                     | C                              | B6.SJL/Jax           |
| 136437585                     | agtcat                                |                                | <i>4931440L10Rik</i> | Non-Synonymous | DDY                                   | D                              | B6.SJL/Jax           |
| 141671087                     | a                                     | g                              | <i>Gm4788</i>        | Non-Synonymous | V                                     | A                              | B6.SJL/Jax           |
| 141727733                     | t                                     | g                              | <i>Cfhr2</i>         | Non-Synonymous | R                                     | S                              | Not confirmed.       |
| 145586871                     | c                                     | t                              | <i>Glrx2</i>         | Non-Synonymous | A                                     | V                              | B6.SJL/Jax           |

**Supplementary Table 2** List of the coding variants identified by whole exome sequencing of B6.SJL/NCI mouse gDNA remaining after ruling out variants listed in **Supplementary Table 1**. Sanger sequencing confirmed that 6 coding variants were present in B6.SJL/Jax or SJL strains (right panel). One coding variant in *Cfhr2* was not confirmed to be present in B6.SJL/NCI or B6.SJL/Jax strains (“Not confirmed,” right panel). Sanger sequencing confirmed that the *Sox13* coding variant was present in B6.SJL/NCI and B6.SJL/Tac but absent in B6.SJL/Jax and B6.SJL/CR substrains.

**Supplementary Table 3**

| Variation Location Left (bp) | Variation Location Right (bp) | C57BL/6 reference nucleotide sequence | B6.SJL/NCI nucleotide sequence | Gene                 | Forward (5' to 3')        | Reverse (5' to 3')         |
|------------------------------|-------------------------------|---------------------------------------|--------------------------------|----------------------|---------------------------|----------------------------|
| <b>135283363</b>             | <b>135283363</b>              |                                       | <b>g</b>                       | <b><i>Sox13</i></b>  | GAACGGAGAAAGGGAAGGAC      | CCTCTTTGCTCTTGGCTCAC       |
| 135811708                    | 135811709                     | c                                     | t                              | <i>Prelp</i>         | GCCTCAGCTGTTCCAAGTTC      | ACCGACAAGACCAAACCTG        |
| 136045970                    | 136045973                     | aag                                   | ggt                            | <i>Chit1</i>         | GGCAGTCCAGAACCATTGT       | GCAGATGCTTTAGCCCTGAG       |
| 136094057                    | 136094058                     | c                                     | t                              | <i>Mybph</i>         | AGCCAGTAGGGTGGGTTTCT      | GAAGTAGGTCTGCGGCAAAG       |
| 136437579                    | 136437585                     | agtcac                                |                                | <i>4931440L10Rik</i> | CCCAGTGAGCAGGGTGAGTAG     | ACAATGCACCAGCTTTACCC       |
| 141671086                    | 141671087                     | a                                     | g                              | <i>Gm4788</i>        | ATGAAGAGCTGCTCCCAAAG      | TGATATCCCCACAAACCAATG      |
| 141727732                    | 141727733                     | t                                     | g                              | <i>Cfhr2</i>         | CATCTGTGCATAGTGAATAGGCTAA | TCTTTCTGATGAAGTTATTGTCAACT |
| 145586870                    | 145586871                     | c                                     | t                              | <i>Glrx2</i>         | GGGCGTGAGGAGCTCGGGAG      | CCGGCTGGGTCCACACTAAC       |

**Supplementary Table 3** List of primer pairs used for PCR amplification of gene segments containing the indicated coding variants. Sanger sequencing was used to confirm the presence or absence of these mutations in B6.SJL/NCI and B6.SJL/Jax or SJL mice.

**Supplementary Table 4**

| <b>Gene</b>              | <b>Forward (5' to 3')</b> | <b>Reverse (5' to 3')</b> | <b>Ref.</b>  |
|--------------------------|---------------------------|---------------------------|--------------|
| <i>Il17a</i>             | ATCCCTCAAAGCTCAGCGTGTC    | GGGTCTTCATTGCGGTGGAGAG    | <sup>2</sup> |
| <i>Il17f</i>             | CAAACCAGGGCATTCTGT        | ATGGTGCTGTCTTCCTGACC      | <sup>3</sup> |
| <i>Defb3</i>             | GTCTCCACCTGCAGCTTTTA      | GACGAGTGTGCAATGCAC        | n.a.         |
| <i>Defb4</i>             | TCTCCACTTGCAGCCTTTACC     | AGCATATGGCTCCATTGGTCA     | n.a.         |
| <i>Cxcl2</i>             | TGAACAAAGGCAAGGCTAACTG    | CAGGTACGATCCAGGCTTCC      | n.a.         |
| <i>Sox13</i> (exon6-7)   | GCTTTACCTATTCAGCCCAT      | ACCTCTTCACCACAGGGG        | n.a.         |
| <i>Sox13</i> (exon12-13) | CAGGGTGCTCGCCAAAG         | CCCAGGGAACAGGATA          | n.a.         |
| <i>Sox13</i> (exon1-2)   | GATGCCACCAACGCTAAA        | GAAGCAGCCTCGGAAGC         | n.a.         |

**Supplementary Table 4** List of primer pairs used for real-time PCR.

### Supplementary References:

1. Zebedee, S.L., Barritt, D.S. & Raschke, W.C. Comparison of mouse Ly5a and Ly5b leucocyte common antigen alleles. *Dev Immunol* **1**, 243-254 (1991).
2. Smith, E. *et al.* IL-17A inhibits the expansion of IL-17A-producing T cells in mice through "short-loop" inhibition via IL-17 receptor. *J Immunol* **181**, 1357-1364 (2008).
3. Okamoto, K. *et al.* IkappaBzeta regulates T(H)17 development by cooperating with ROR nuclear receptors. *Nature* **464**, 1381-1385 (2010).
